# Supplementary material
Source: publisher figshare collection journal article supplement (https://frontiersin.figshare.com/ndownloader/files/13755371)

# Supplemental Information

## **SAG/RBX2 E3 Ubiquitin Ligase Differentially Regulates Inflammatory Responses of Myeloid Cell Subsets**

Xiufang Xiong, Nathan D. Mathewson, Hua Li, Mingjia Tan, Hideaki Fujiwara, Haomin Li, Pavan Reddy, and Yi Sun

### **MATERIALS AND METHODS**

#### **Dendritic cell preparation**

Bone marrow cells were flushed from the femurs of 8- to 12-week- old female C57BL/6 mice and cultured in 150 x 15-mm CytoOne petri dishes (USA Scientific, Ocala, FL) at  $1 \times 10^7$  in 20ml of RPMI supplemented with 10% FCS, 4mM L-glutamine, 10 U/ml penicillin, 100  $\mu$ g/ml streptomycin, 0.5 mM 2-ME, 20ng/ml GM-CSF. On day 4, 20ml of fresh complete RPMI containing 20 ng/ml GM-CSF was added to each culture. After 7 days of culture, the loosely adherent cells were harvested and purified using anti-CD11c magnetic microbeads (Miltenyi Biotec Ltd., Auburn, CA) and the autoMACS (Miltenyi Biotec).

### **FIGURE LEGENDS**

#### **Supplemental Figure 1. Representative phenotype data.**

(A) Total cells present in the spleen (left), peripheral lymph node (PLN, middle), and bone marrow (BM, right) in naïve WT (n=8) and KO (n=8) mice. Percent expression of indicated marker in the (B) spleen, (C) bone marrow, and (D) pooled peripheral

lymph nodes. \*  $p < 0.05$ .

**Supplemental Figure 2. Flow cytometry gating scheme for cell analysis.**

Cells isolated were gated on  $CD11b^+$  and  $F4.80^+$  (red box highlight) to examine macrophages in the (A) peritoneum and (B) spleen. Macrophages were analyzed for cytokine production following incubation with golgi stop protein transport inhibitor for 6 hours. (C) Neutrophils were examined in whole splenocyte populations by gating on  $Gr-1^+$  and  $CD11b^+$  cells (red highlight) and measuring cytokine expression.

**Supplemental Figure 3. Microarray analysis results.**

(A) *Sag* expression is significantly decreased in bone marrow cells from  $LysM-Cre^+/Sag^{fl/fl}$  mice. Bone marrow cells were flushed from  $LysM-Cre^-/Sag^{fl/fl}$  wild type (WT) and  $LysM-Cre^+/Sag^{fl/fl}$  knockout (KO) mice, and then subjected to mRNA extraction, followed by RT-PCR. (B-C) Gene ontology (GO) analysis of 1141 genes whose expression was specifically altered in response to LPS in bone marrows from KO mice (B). #: the set of genes responsive to LPS. The genes responsive to LPS in (B) were listed (C).

**Supplemental Figure 4. No significant difference in cytokine production from LPS-stimulated WT and KO dendritic cells that did not express LysM enzyme.**

(A)  $TNF\alpha$  and (B) IL-6 cytokines released and (C-D) corresponding mRNA expression by bone marrow derived dendritic cells (BMDCs) stimulated with LPS (100ng/ml) for 6 hours ( $n=5$  for each genotype).

A

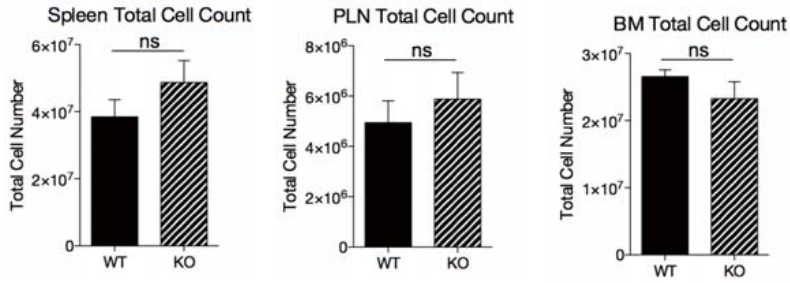

B Spleen

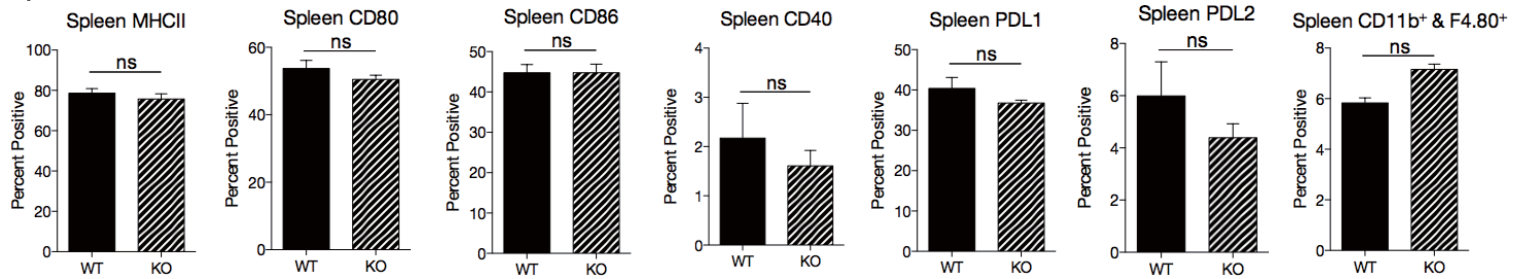

C Bone Marrow

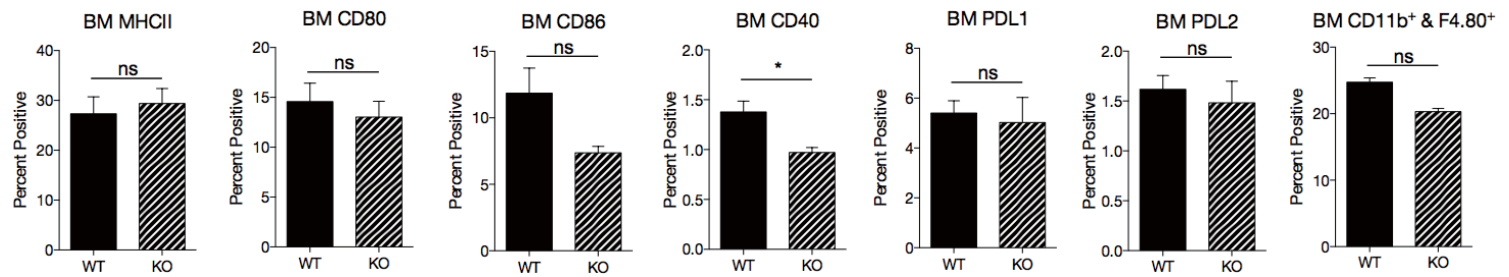

D Peripheral Lymph Nodes

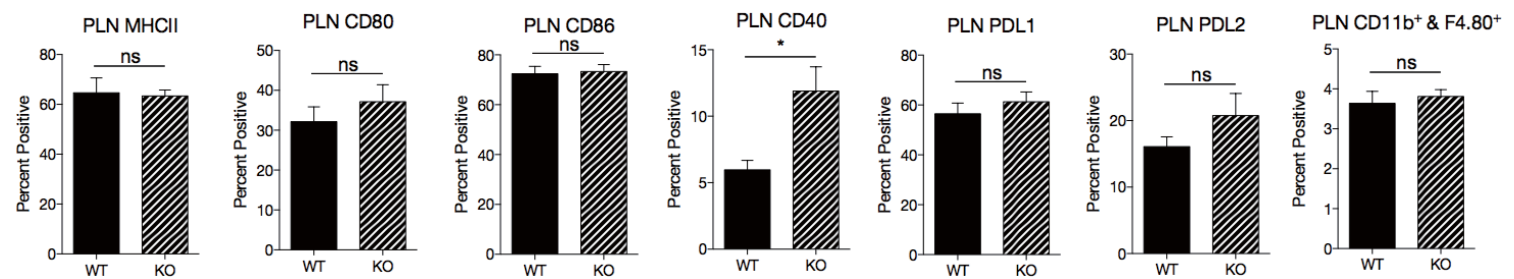

## A Peritoneal macrophage gating - Unstimulated

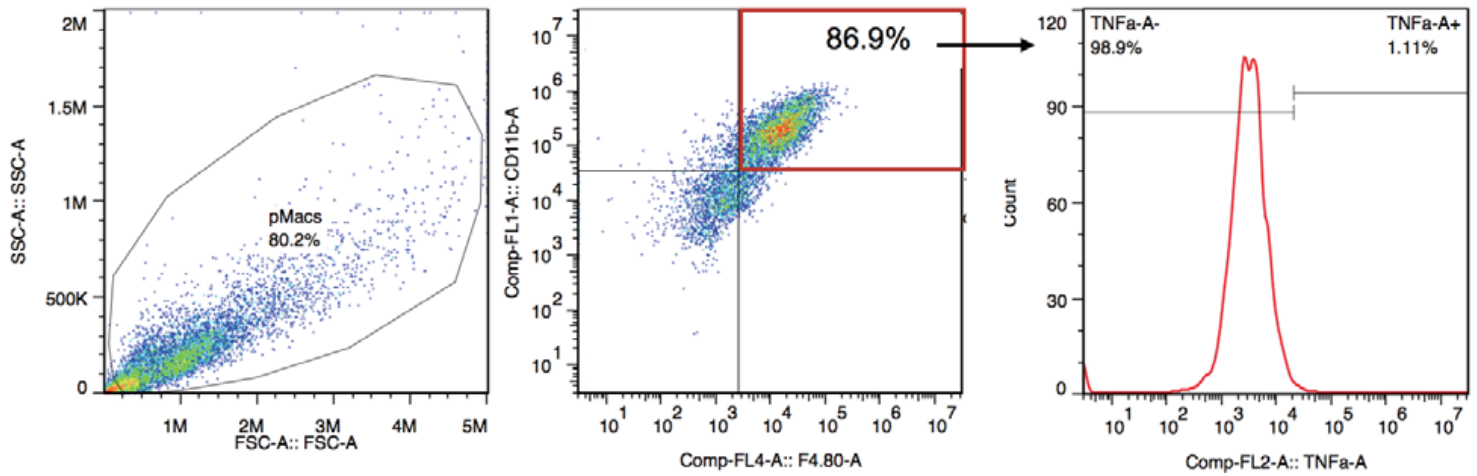

## B Splenic macrophages gating - Unstimulated

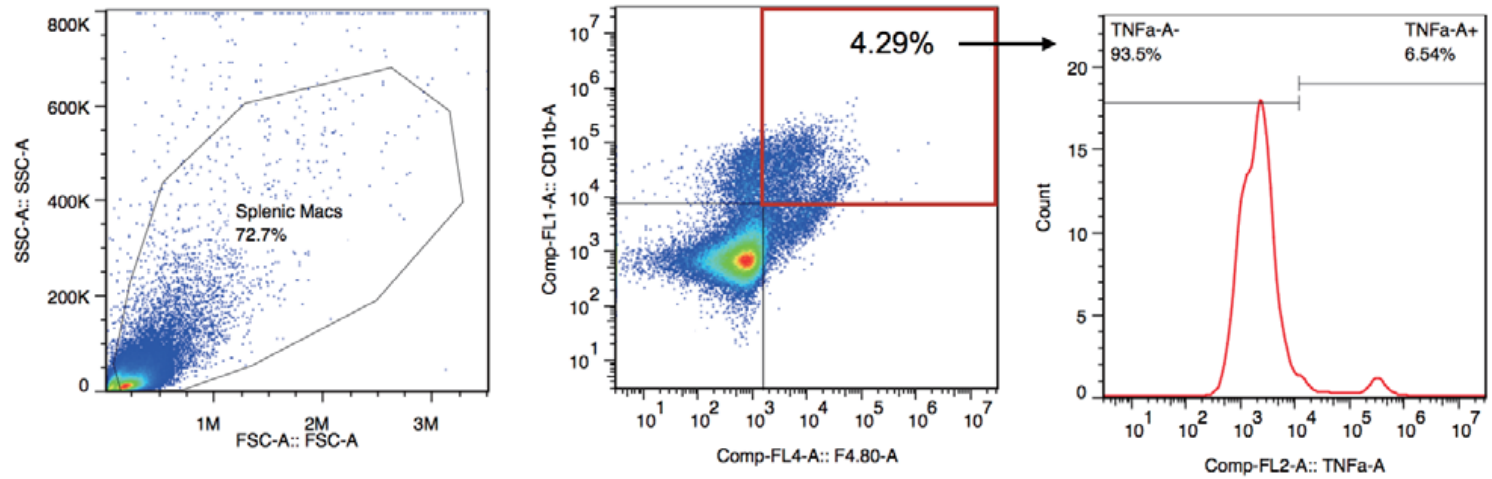

## C Splenic neutrophil gating

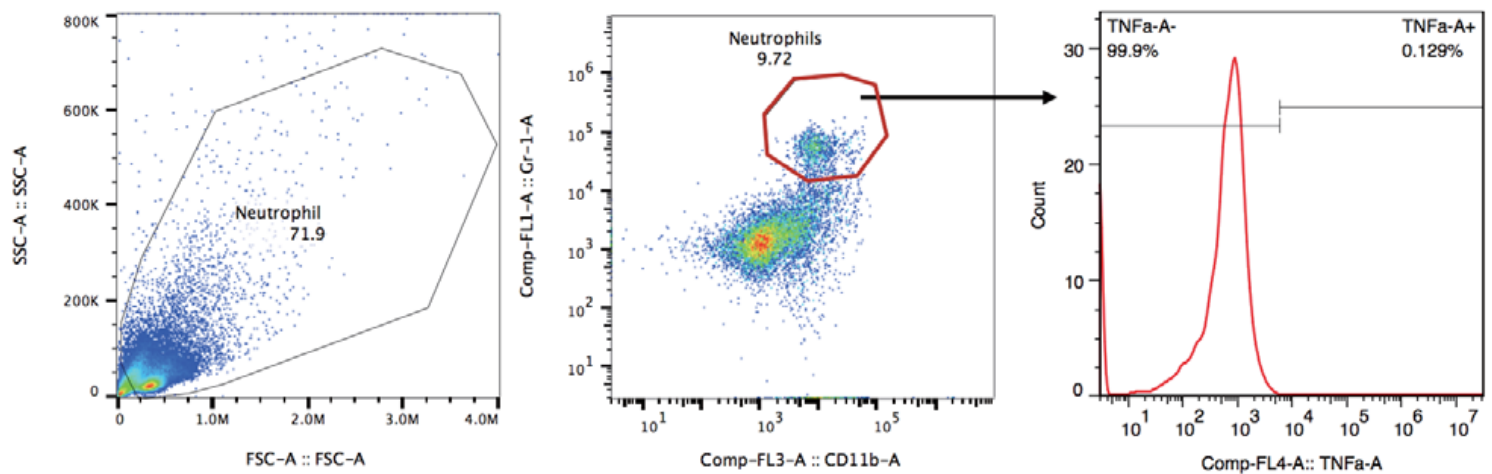

A

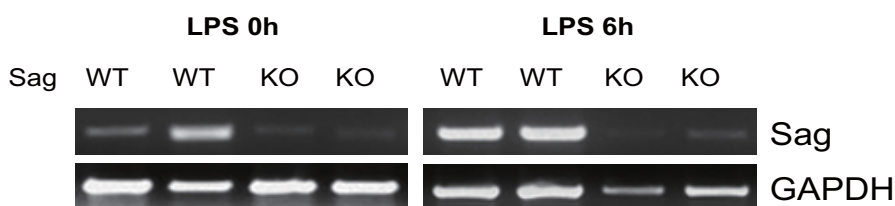

B

## GO analysis (1141 genes)

| Sublist | Category         | Term                                                                      | RT | Genes | Count | %   | P-Value | Benjamini |
|---------|------------------|---------------------------------------------------------------------------|----|-------|-------|-----|---------|-----------|
|         | GOTERM_BP_DIRECT | <a href="#">defense response to Gram-positive bacterium</a>               | RT |       | 18    | 2.0 | 1.6E-7  | 4.7E-4    |
|         | GOTERM_BP_DIRECT | <a href="#">oxidation-reduction process</a>                               | RT |       | 55    | 6.1 | 1.4E-6  | 2.0E-3    |
|         | GOTERM_BP_DIRECT | <a href="#">phagocytosis</a>                                              | RT |       | 11    | 1.2 | 3.7E-5  | 3.4E-2    |
|         | GOTERM_BP_DIRECT | <a href="#">negative regulation of B cell proliferation</a>               | RT |       | 7     | 0.8 | 5.2E-5  | 3.6E-2    |
|         | GOTERM_BP_DIRECT | <a href="#">carbohydrate metabolic process</a>                            | RT |       | 22    | 2.4 | 9.5E-5  | 5.3E-2    |
|         | GOTERM_BP_DIRECT | <a href="#">negative regulation of growth of symbiont in host</a>         | RT |       | 7     | 0.8 | 1.0E-4  | 4.7E-2    |
|         | GOTERM_BP_DIRECT | <a href="#">B cell apoptotic process</a>                                  | RT |       | 6     | 0.7 | 1.0E-4  | 4.2E-2    |
|         | GOTERM_BP_DIRECT | <a href="#">innate immune response in mucosa</a>                          | RT |       | 7     | 0.8 | 1.4E-4  | 4.8E-2    |
|         | GOTERM_BP_DIRECT | <a href="#">receptor internalization</a>                                  | RT |       | 9     | 1.0 | 1.7E-4  | 5.1E-2    |
|         | GOTERM_BP_DIRECT | <a href="#">fatty acid metabolic process</a>                              | RT |       | 18    | 2.0 | 1.9E-4  | 5.4E-2    |
|         | GOTERM_BP_DIRECT | <a href="#">antibacterial humoral response</a>                            | RT |       | 8     | 0.9 | 2.9E-4  | 7.3E-2    |
|         | GOTERM_BP_DIRECT | <a href="#">metabolic process</a>                                         | RT |       | 36    | 4.0 | 3.0E-4  | 6.9E-2    |
|         | GOTERM_BP_DIRECT | <a href="#">positive regulation of phagocytosis, engulfment</a>           | RT |       | 5     | 0.6 | 6.9E-4  | 1.4E-1    |
|         | GOTERM_BP_DIRECT | <a href="#">cell cycle</a>                                                | RT |       | 41    | 4.5 | 2.1E-3  | 3.5E-1    |
|         | GOTERM_BP_DIRECT | <a href="#">cytokinesis</a>                                               | RT |       | 7     | 0.8 | 3.4E-3  | 4.8E-1    |
|         | GOTERM_BP_DIRECT | <a href="#">B cell homeostasis</a>                                        | RT |       | 6     | 0.7 | 3.4E-3  | 4.6E-1    |
|         | GOTERM_BP_DIRECT | <a href="#">positive regulation of angiogenesis</a>                       | RT |       | 13    | 1.4 | 3.6E-3  | 4.5E-1    |
|         | GOTERM_BP_DIRECT | <a href="#">positive regulation of T cell proliferation</a>               | RT |       | 9     | 1.0 | 4.1E-3  | 4.8E-1    |
|         | GOTERM_BP_DIRECT | <a href="#">mitotic nuclear division</a>                                  | RT |       | 22    | 2.4 | 4.4E-3  | 4.9E-1    |
|         | GOTERM_BP_DIRECT | <a href="#">aging</a>                                                     | RT |       | 16    | 1.8 | 4.5E-3  | 4.7E-1    |
|         | GOTERM_BP_DIRECT | <a href="#">positive regulation of autophagosome assembly</a>             | RT |       | 4     | 0.4 | 4.6E-3  | 4.7E-1    |
|         | GOTERM_BP_DIRECT | <a href="#">regulation of interleukin-2 biosynthetic process</a>          | RT |       | 3     | 0.3 | 4.8E-3  | 4.6E-1    |
|         | GOTERM_BP_DIRECT | <a href="#">cell division</a>                                             | RT |       | 27    | 3.0 | 5.3E-3  | 4.8E-1    |
| #       | GOTERM_BP_DIRECT | <a href="#">response to lipopolysaccharide</a>                            | RT |       | 17    | 1.9 | 6.3E-3  | 5.3E-1    |
|         | GOTERM_BP_DIRECT | <a href="#">pre-B cell differentiation</a>                                | RT |       | 4     | 0.4 | 6.4E-3  | 5.2E-1    |
|         | GOTERM_BP_DIRECT | <a href="#">lipid metabolic process</a>                                   | RT |       | 31    | 3.4 | 6.9E-3  | 5.3E-1    |
|         | GOTERM_BP_DIRECT | <a href="#">hemopoiesis</a>                                               | RT |       | 10    | 1.1 | 7.8E-3  | 5.6E-1    |
|         | GOTERM_BP_DIRECT | <a href="#">positive regulation of erythrocyte differentiation</a>        | RT |       | 5     | 0.6 | 9.1E-3  | 6.1E-1    |
|         | GOTERM_BP_DIRECT | <a href="#">cellular response to mercury ion</a>                          | RT |       | 3     | 0.3 | 9.2E-3  | 6.0E-1    |
|         | GOTERM_BP_DIRECT | <a href="#">negative regulation of interleukin-8 biosynthetic process</a> | RT |       | 3     | 0.3 | 9.2E-3  | 6.0E-1    |
|         | GOTERM_BP_DIRECT | <a href="#">phospholipid biosynthetic process</a>                         | RT |       | 8     | 0.9 | 9.4E-3  | 5.9E-1    |
|         | GOTERM_BP_DIRECT | <a href="#">positive regulation of apoptotic process</a>                  | RT |       | 24    | 2.7 | 9.6E-3  | 5.9E-1    |
|         | GOTERM_BP_DIRECT | <a href="#">movement of cell or subcellular component</a>                 | RT |       | 5     | 0.6 | 1.1E-2  | 6.2E-1    |
|         | GOTERM_BP_DIRECT | <a href="#">positive regulation of phagocytosis</a>                       | RT |       | 7     | 0.8 | 1.2E-2  | 6.6E-1    |
|         | GOTERM_BP_DIRECT | <a href="#">sphingolipid metabolic process</a>                            | RT |       | 6     | 0.7 | 1.4E-2  | 7.0E-1    |

C

| OFFICIAL_GENE_SYMBOL | GENE NAME                                                                       | Related Genes      | Species                      |
|----------------------|---------------------------------------------------------------------------------|--------------------|------------------------------|
| FasI                 | <a href="#">Fas ligand (TNF superfamily, member 6)(FasI)</a>                    | <a href="#">RG</a> | <a href="#">Mus musculus</a> |
| Adm                  | <a href="#">adrenomedullin(Adm)</a>                                             | <a href="#">RG</a> | <a href="#">Mus musculus</a> |
| Ace                  | <a href="#">angiotensin I converting enzyme (peptidyl-dipeptidase A) 1(Ace)</a> | <a href="#">RG</a> | <a href="#">Mus musculus</a> |
| Cxcl1                | <a href="#">chemokine (C-X-C motif) ligand 1(Cxcl1)</a>                         | <a href="#">RG</a> | <a href="#">Mus musculus</a> |
| Cxcl13               | <a href="#">chemokine (C-X-C motif) ligand 13(Cxcl13)</a>                       | <a href="#">RG</a> | <a href="#">Mus musculus</a> |
| C5ar1                | <a href="#">complement component 5a receptor 1(C5ar1)</a>                       | <a href="#">RG</a> | <a href="#">Mus musculus</a> |
| Elane                | <a href="#">elastase, neutrophil expressed(Elane)</a>                           | <a href="#">RG</a> | <a href="#">Mus musculus</a> |
| Hmgb2                | <a href="#">high mobility group box 2(Hmgb2)</a>                                | <a href="#">RG</a> | <a href="#">Mus musculus</a> |
| Lbp                  | <a href="#">lipopolysaccharide binding protein(Lbp)</a>                         | <a href="#">RG</a> | <a href="#">Mus musculus</a> |
|                      |                                                                                 |                    |                              |
| Mgst2                | <a href="#">microsomal glutathione S-transferase 2(Mgst2)</a>                   | <a href="#">RG</a> | <a href="#">Mus musculus</a> |
| Maob                 | <a href="#">monoamine oxidase B(Maob)</a>                                       | <a href="#">RG</a> | <a href="#">Mus musculus</a> |
| Mpo                  | <a href="#">myeloperoxidase(Mpo)</a>                                            | <a href="#">RG</a> | <a href="#">Mus musculus</a> |
| Pck2                 | <a href="#">phosphoenolpyruvate carboxykinase 2 (mitochondrial)(Pck2)</a>       | <a href="#">RG</a> | <a href="#">Mus musculus</a> |
| Plcg2                | <a href="#">phospholipase C, gamma 2(Plcg2)</a>                                 | <a href="#">RG</a> | <a href="#">Mus musculus</a> |
| Snca                 | <a href="#">synuclein, alpha(Snca)</a>                                          | <a href="#">RG</a> | <a href="#">Mus musculus</a> |
| Tnfrsf21             | <a href="#">tumor necrosis factor receptor superfamily, member 21(Tnfrsf21)</a> | <a href="#">RG</a> | <a href="#">Mus musculus</a> |
| Tnfrsf4              | <a href="#">tumor necrosis factor receptor superfamily, member 4(Tnfrsf4)</a>   | <a href="#">RG</a> | <a href="#">Mus musculus</a> |

# Supplemental Figure 4

Xiong et. al.

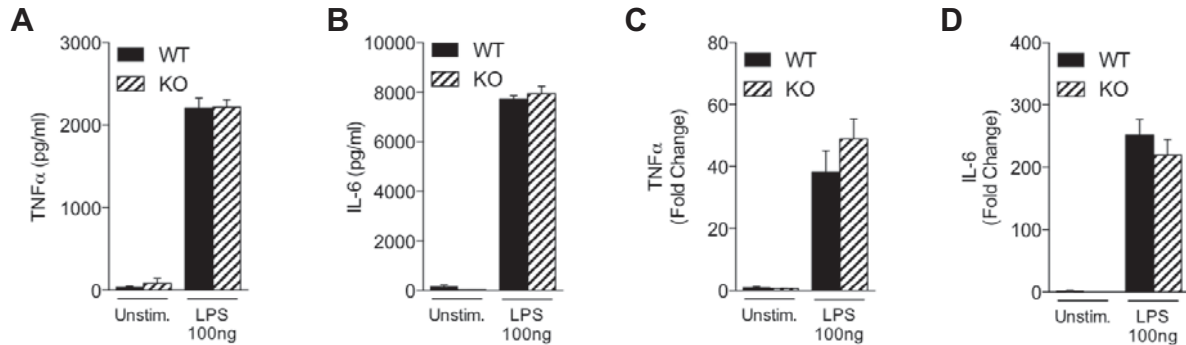

Supplement: Supplementary file [file 13755371]
